# Supplementary material for: Polydimethylsiloxane/Magnesium Oxide Nanosheet Mixed Matrix Membrane for CO2 Separation Application
Source: MDPI journal article supplement (doi:10.3390/membranes13030337), 2023-03-14
Supplement: s1 [file s1]

Article

# Polydimethylsiloxane/Magnesium Oxide Nanosheet Mixed Matrix Membrane for CO<sub>2</sub> Separation Application

Muhd Izzudin Fikry Zainuddin <sup>1</sup>, Abdul Latif Ahmad <sup>1,\*</sup> and Meor Muhammad Hafiz Shah Buddin <sup>2</sup>

<sup>1</sup> School of Chemical Engineering, Universiti Sains Malaysia Engineering Campus, Nibong Tebal 14300, Pulau Pinang, Malaysia

<sup>2</sup> School of Chemical Engineering, College of Engineering, Universiti Teknologi MARA, Shah Alam 40450, Selangor, Malaysia

\* Correspondence: chlatif@usm.my

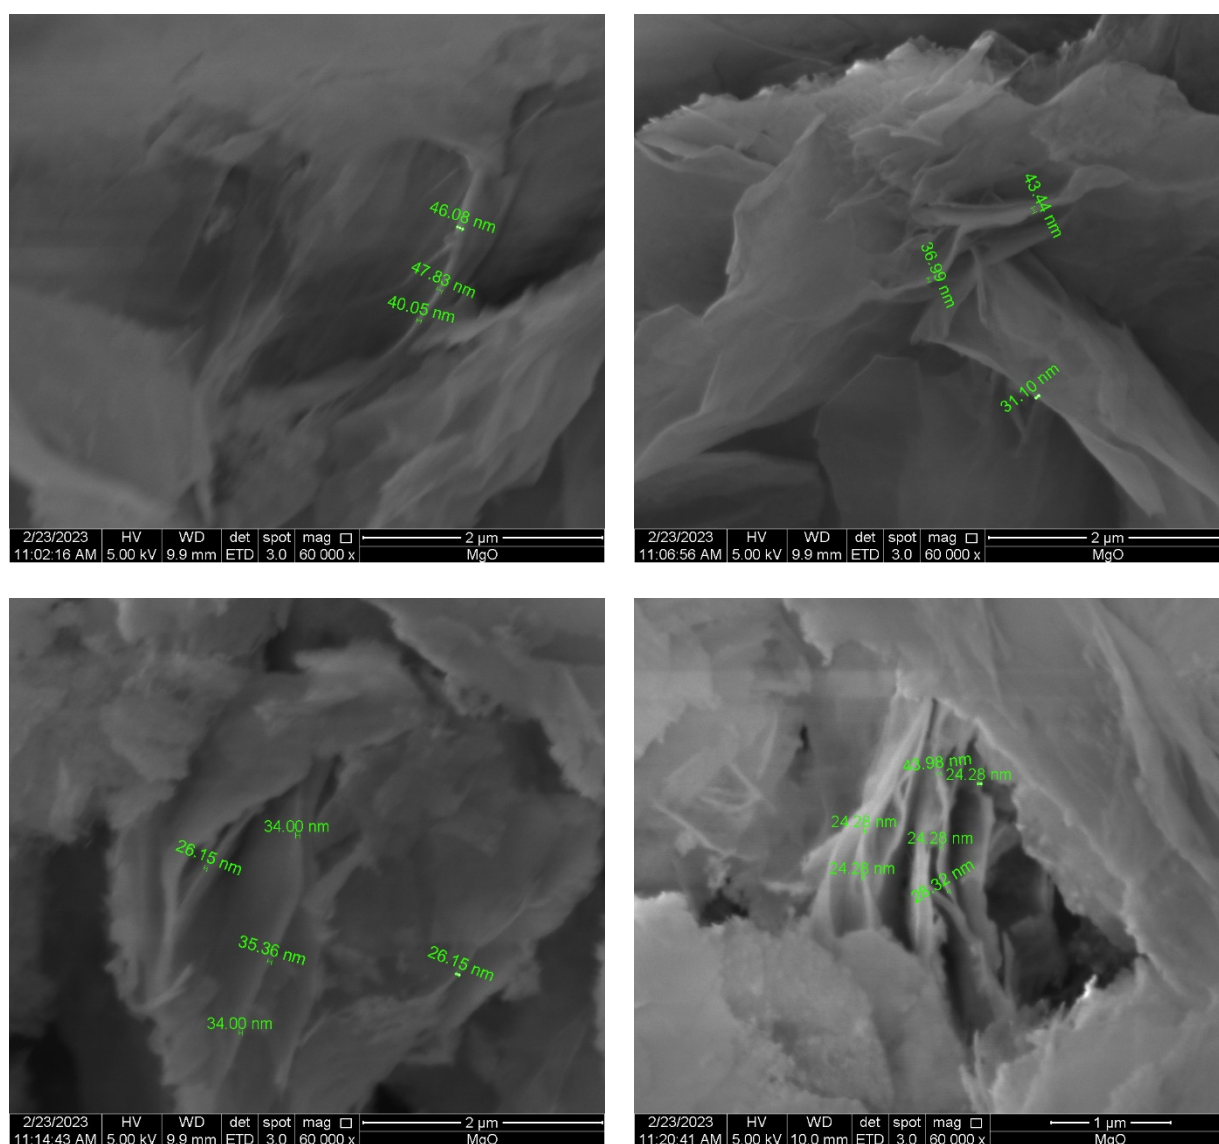

**Figure S1.** Average thickness of synthesized MgO nanosheet estimated from FESEM images.

**Table S1.** Thickness of the membranes fabricated by solvent evaporation method.

| Membrane | Thickness ( $\mu\text{m}$ ) |
|----------|-----------------------------|
| M1       | $424 \pm 30$                |
| M2       | $262 \pm 2$                 |
| M3       | $256 \pm 1$                 |
| M4       | $311 \pm 6$                 |
| M5       | $300 \pm 16$                |
| M6       | $441 \pm 1$                 |

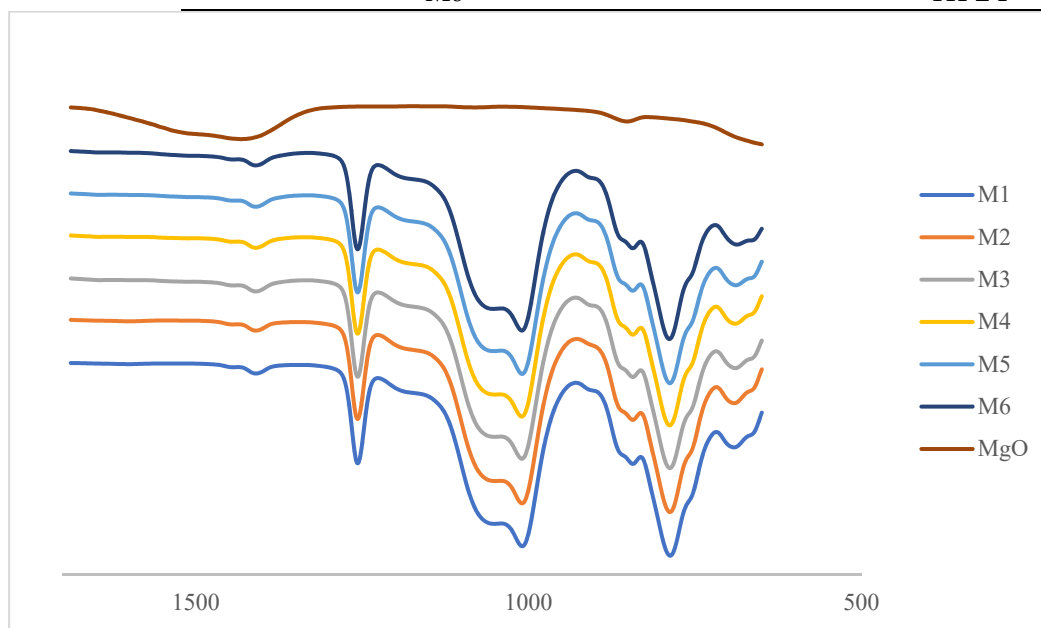**(a)**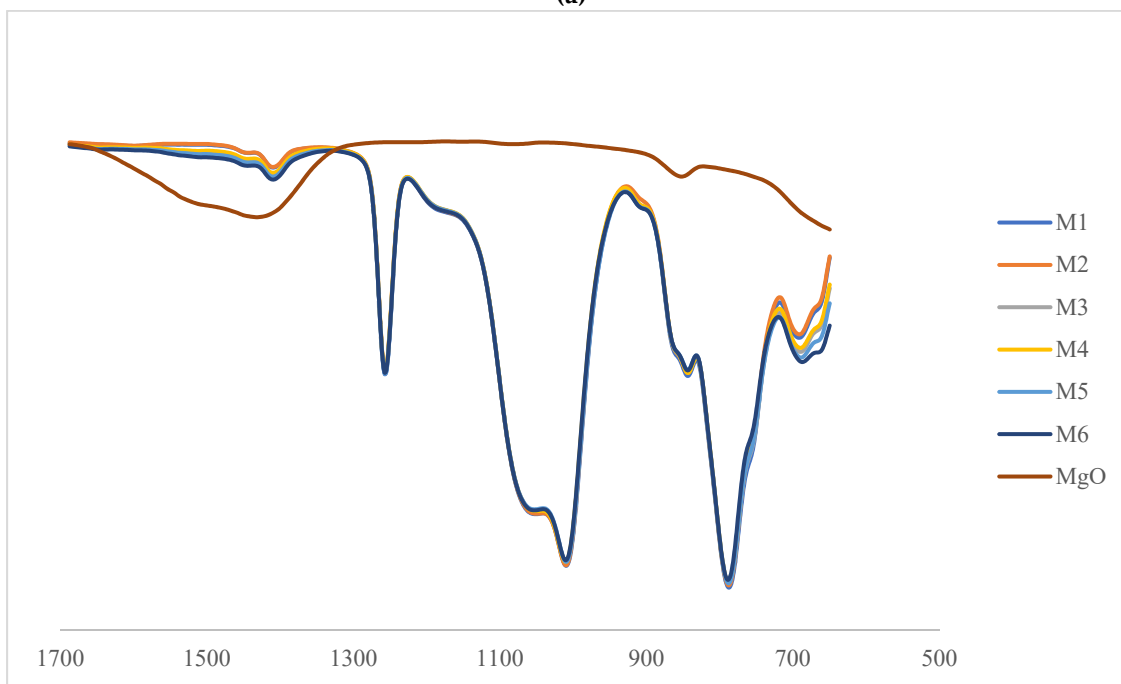**(b)****Figure S2.** (a) Magnified spectra from 600 to 1700  $\text{cm}^{-1}$  (b) difference in the intensity of the peak in the region from 600 to 1700  $\text{cm}^{-1}$ .
